# Supplementary material for: An E2–F12 complex is required for intracellular enveloped virus morphogenesis during vaccinia infection
Source: PubMed Central journal article supplement (PMC2688674; doi:10.1111/j.1462-5822.2009.01296.x), 2009-02-27

**GFP-F12 F13**

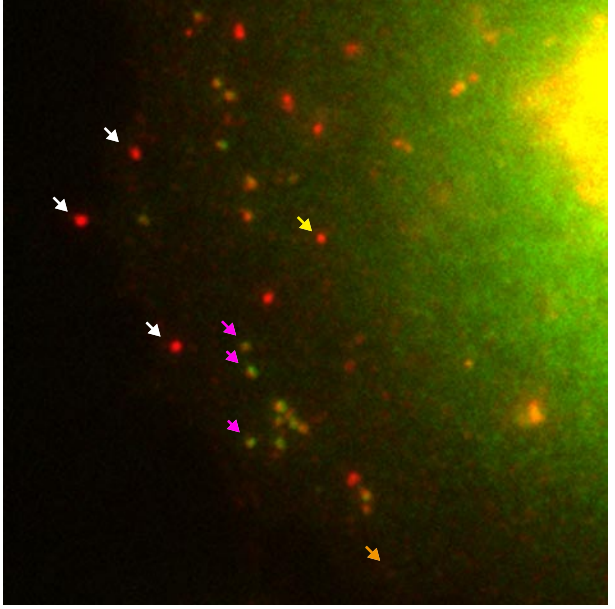

**F13**

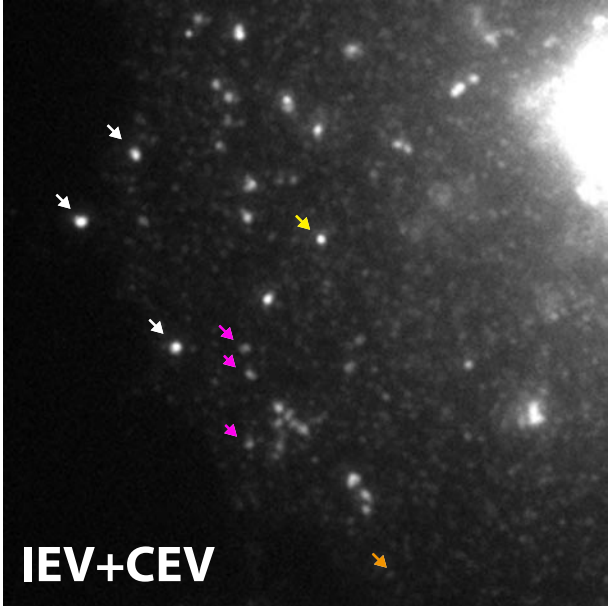

**Extracellular B5**

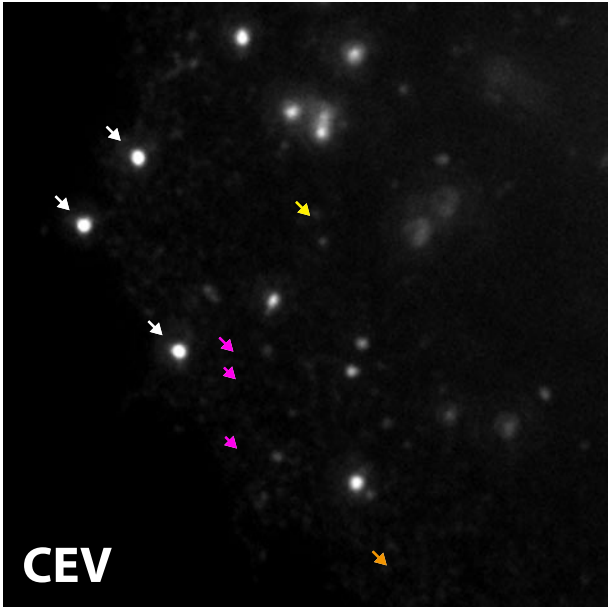

**Ex-B5 GFP-F12 F13**

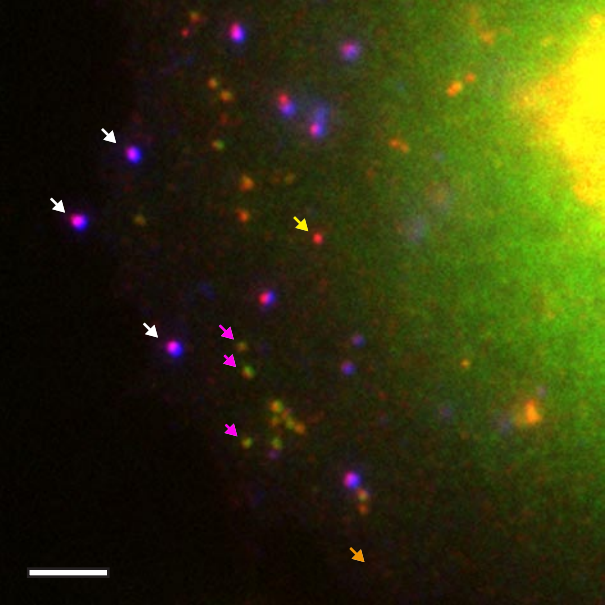

**GFP-F12**

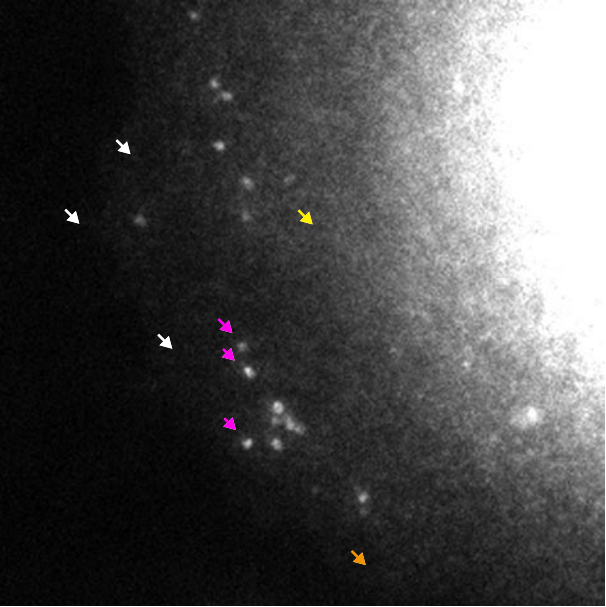

**DAPI**

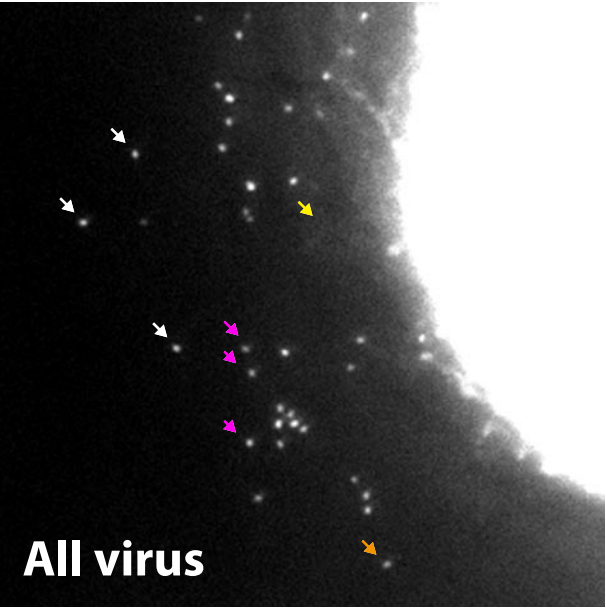

Supplement: cmi0011-0808-SD1.pdf [file cmi0011-0808-SD1.pdf]
