# Supplementary material for: An E2–F12 complex is required for intracellular enveloped virus morphogenesis during vaccinia infection
Source: PubMed Central journal article supplement (PMC2688674; doi:10.1111/j.1462-5822.2009.01296.x), 2009-02-27

BSC-1

$\Delta E2L$

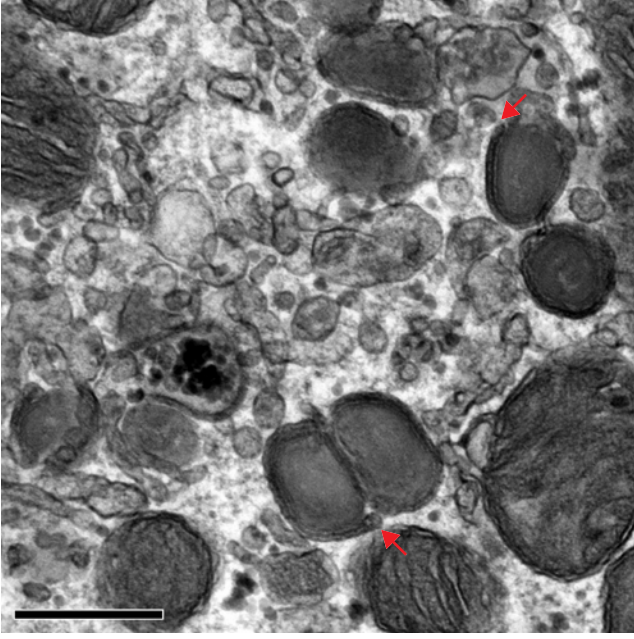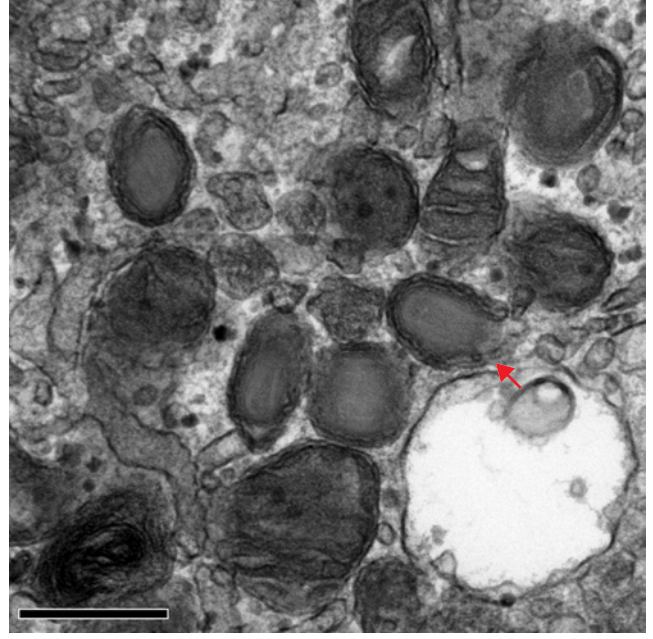

$\Delta F12L$

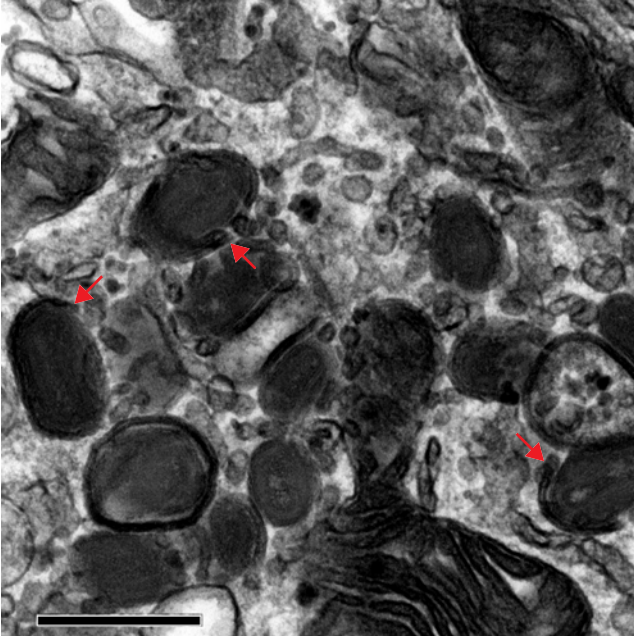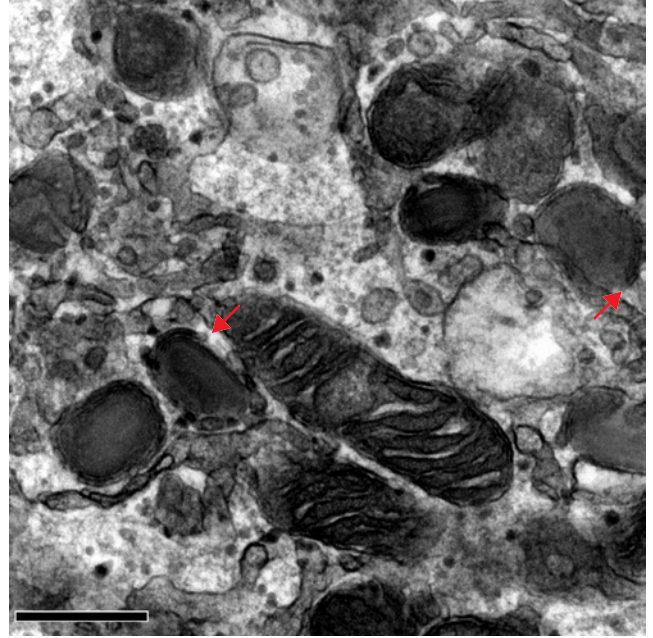

Supplement: cmi0011-0808-SD3.pdf [file cmi0011-0808-SD3.pdf]
